# Supplementary material for: Continuous-flow synthesis of an efficient methanofullerene acceptor for bulk-heterojunction solar cells
Source: Royal Society of Chemistry journal article supplement (doi:10.1039/c0ee00314j), 2010-11-12

## Supporting Information

For

### Continuous-flow synthesis of an efficient methanofullerene acceptor for bulk-heterojunction solar cells

Emiliano Rossi,<sup>1</sup> Tommaso Carofiglio,<sup>1</sup> Andrea Venturi,<sup>1</sup> Alexandre Ndobe,<sup>2</sup> Michele Muccini<sup>2</sup> and Michele Maggini<sup>1</sup>

<sup>1</sup>University of Padova, Department of Chemical Sciences.- Via Marzolo 1, 35131 Padova, Italy

<sup>2</sup>ISMN-CNR - Via P.Gobetti 101, 40129 Bologna, Italy

[michele.maggini@unipd.it](mailto:michele.maggini@unipd.it)

[mmuccini@bo.ismn.cnr.it](mailto:mmuccini@bo.ismn.cnr.it)

### Contents

Synthesis and selected analytical data for *tert*-butyl-4-benzoylbutyrate hydrazone **2**

FIGURE S1 Microreactor setup

FIGURE S2 <sup>1</sup>H NMR spectrum of PCBtB **1**

FIGURE S3 <sup>13</sup>C NMR spectrum of PCBtB **1**

FIGURE S4 APPI-MS spectrum of PCBtB **1**

FIGURE S5 HPLC trace for PCBtB **1**

FIGURE S6 FT-IR spectrum of *tert*-butyl-4-benzoylbutyrate diazomethane **4**

Synthesis and selected analytical data for *tert*-butyl-4-benzoylbutyrate hydrazone **2**

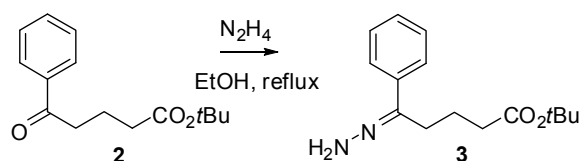

To a solution of ester **2** (420 mg, 1.69 mmol) in ethanol (6 ml), 0.8 ml (16.5 mmol) of hydrazine hydrate were added and the mixture was brought at reflux temperature for 4.5 hours. Then the solvents were evaporated under reduced pressure and the product dried in vacuo. 360 mg (81%) of a clear oil were isolated and used for the next step without further purification. <sup>1</sup>H-NMR (250 MHz, CDCl<sub>3</sub>) δ (ppm): 7.57 (m, 2H); 7.29 (m, 3H); 5.64 (br-s, 2H); 2.56 (t, 2H); 2.26 (t, 2H); 1.75 (m, 2H); 1.39 (s, 9H). IR (KBr) 3403, 3239, 2977, 2933, 1724, 1367, 1147, 695 cm<sup>-1</sup>; ESI-MS *m/z* 263 [M+H]<sup>+</sup>.

FT-IR spectrum of **3** (KBr)

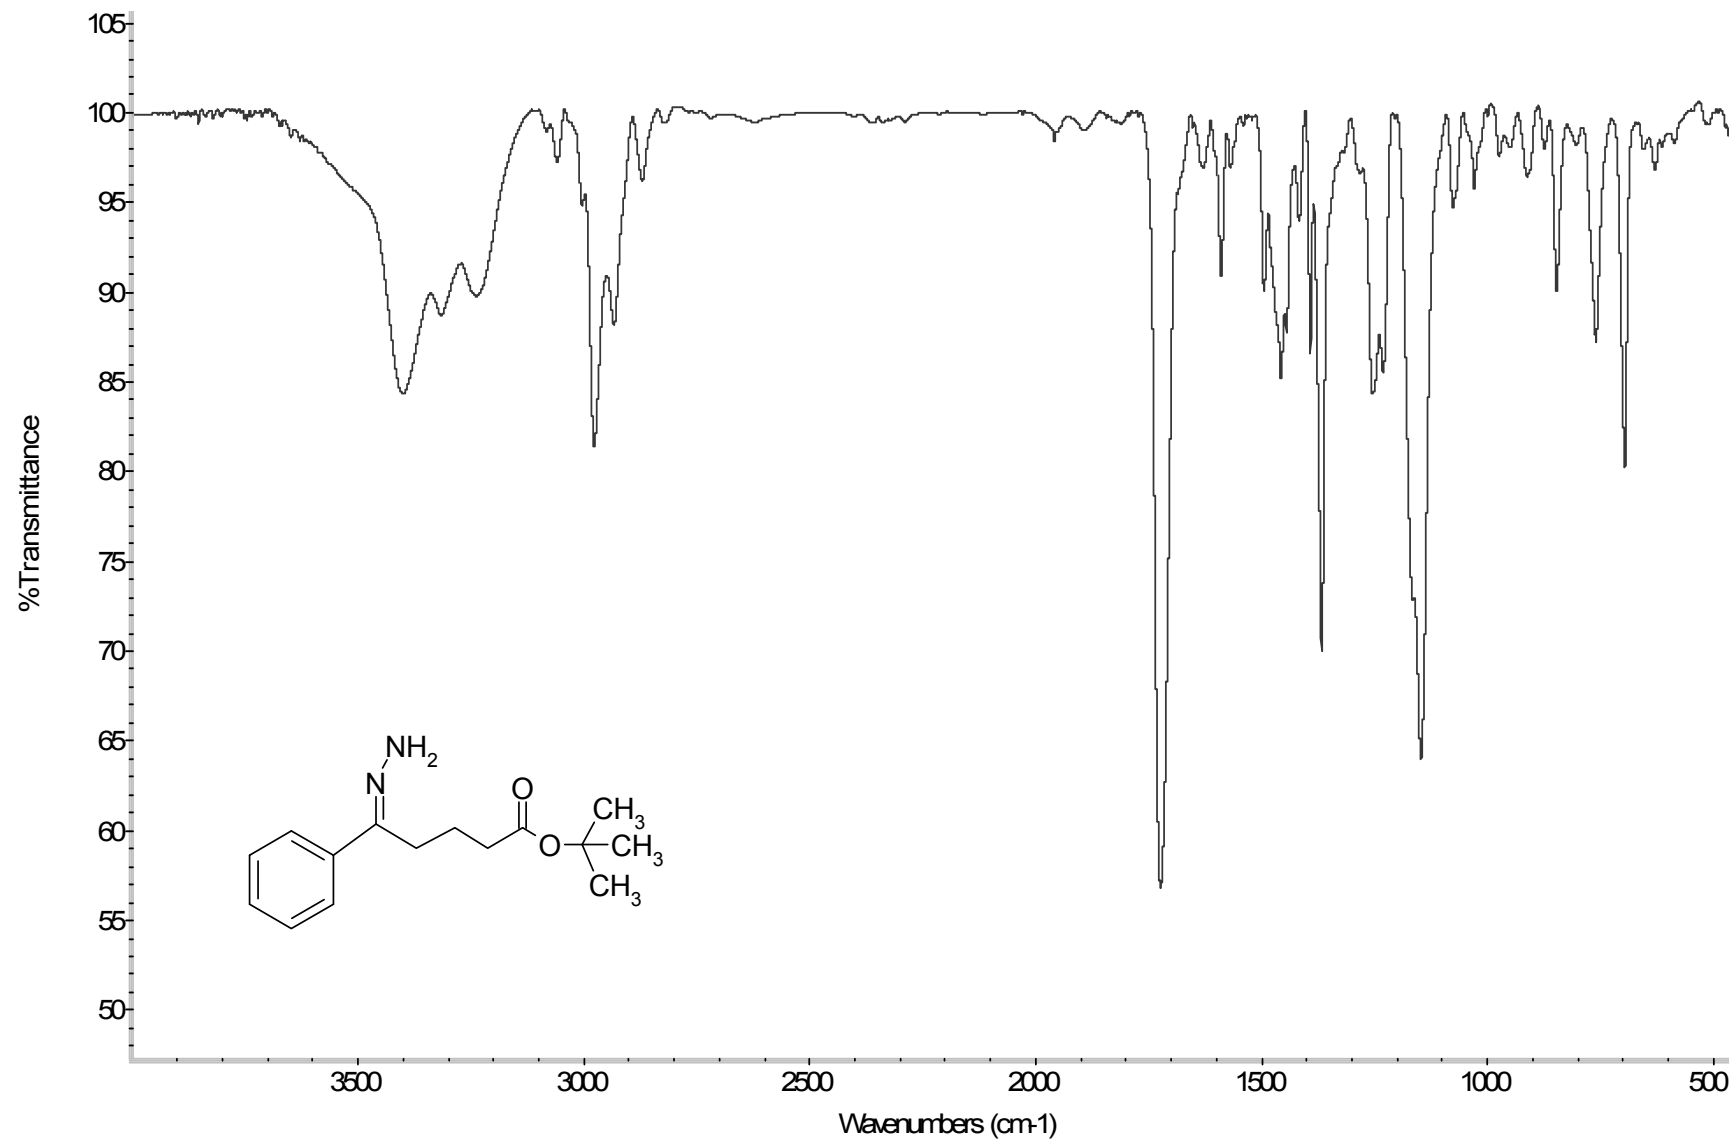

$^1\text{H}$  NMR of **3**,  $\text{CDCl}_3$

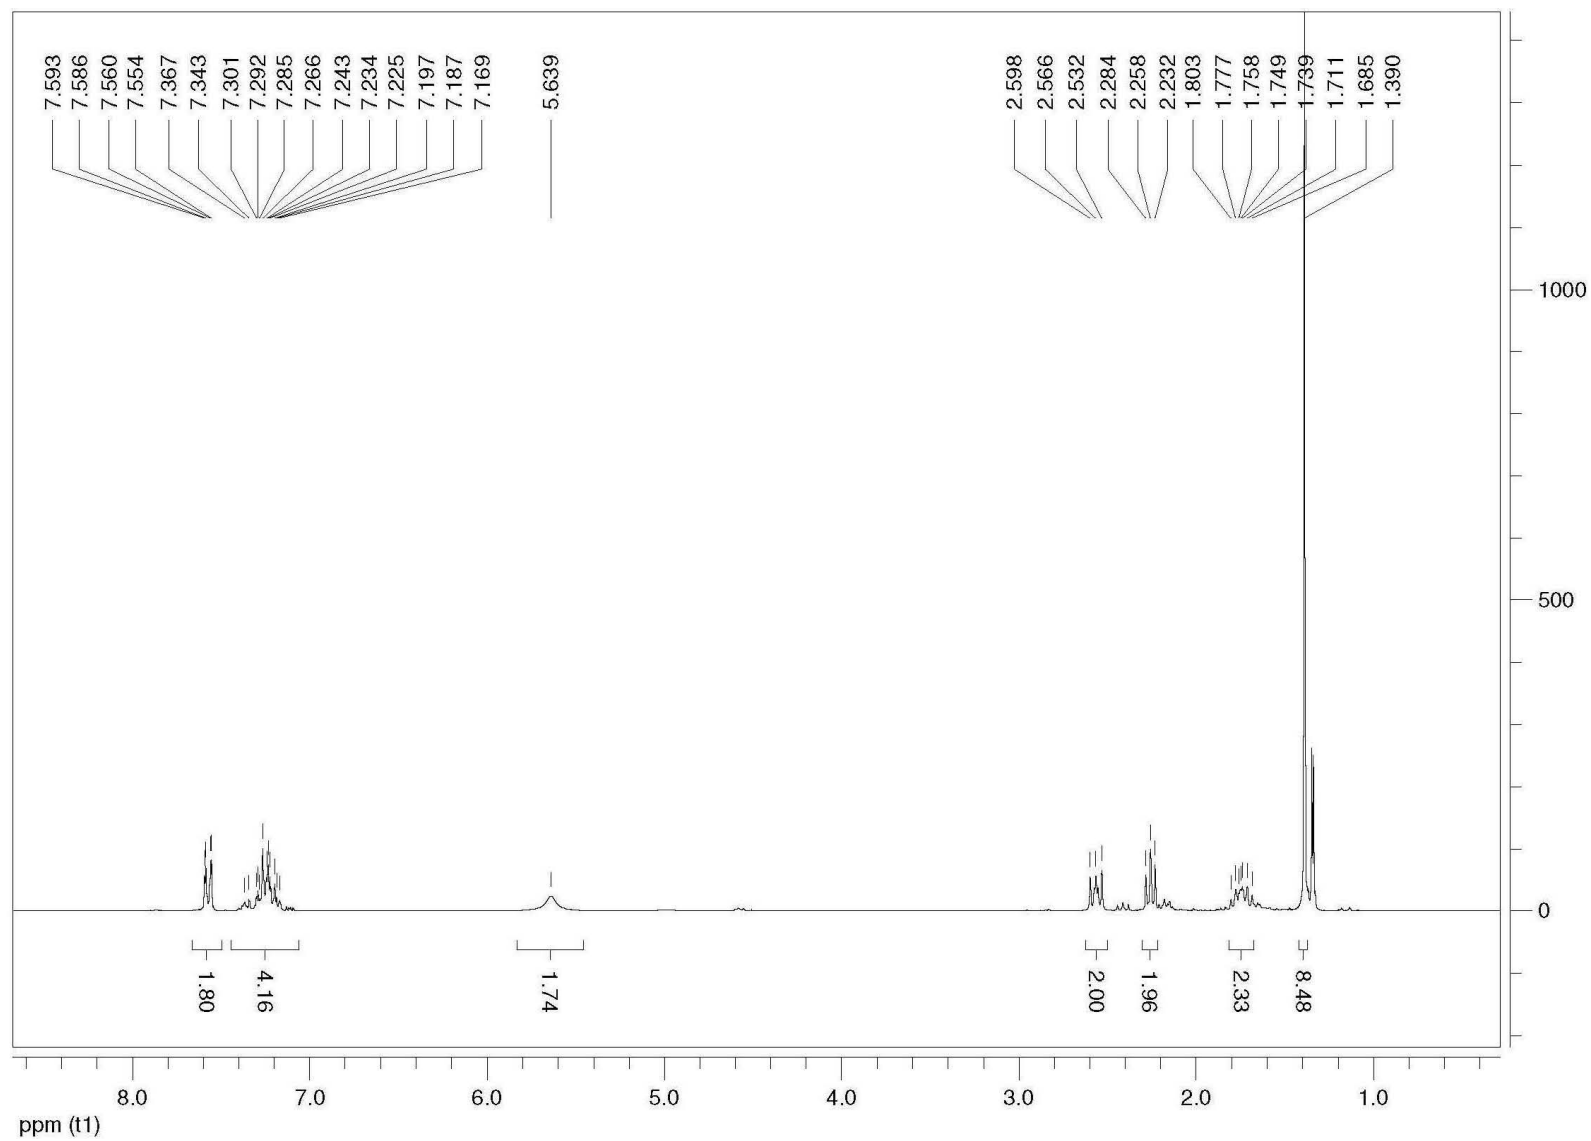

### ESI-MS spectrum of **3**

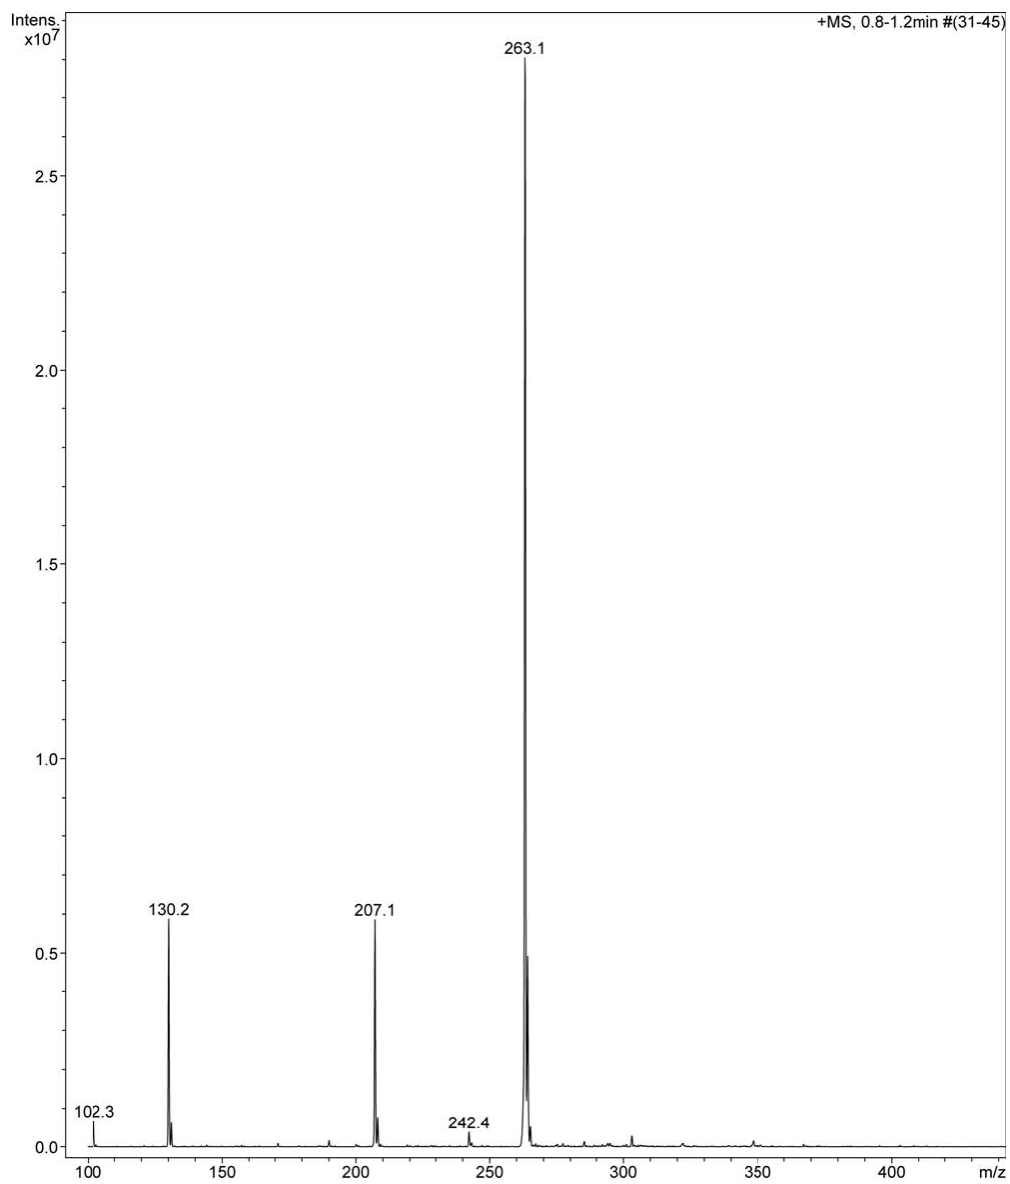

**FIGURE S1: microreactor setup**

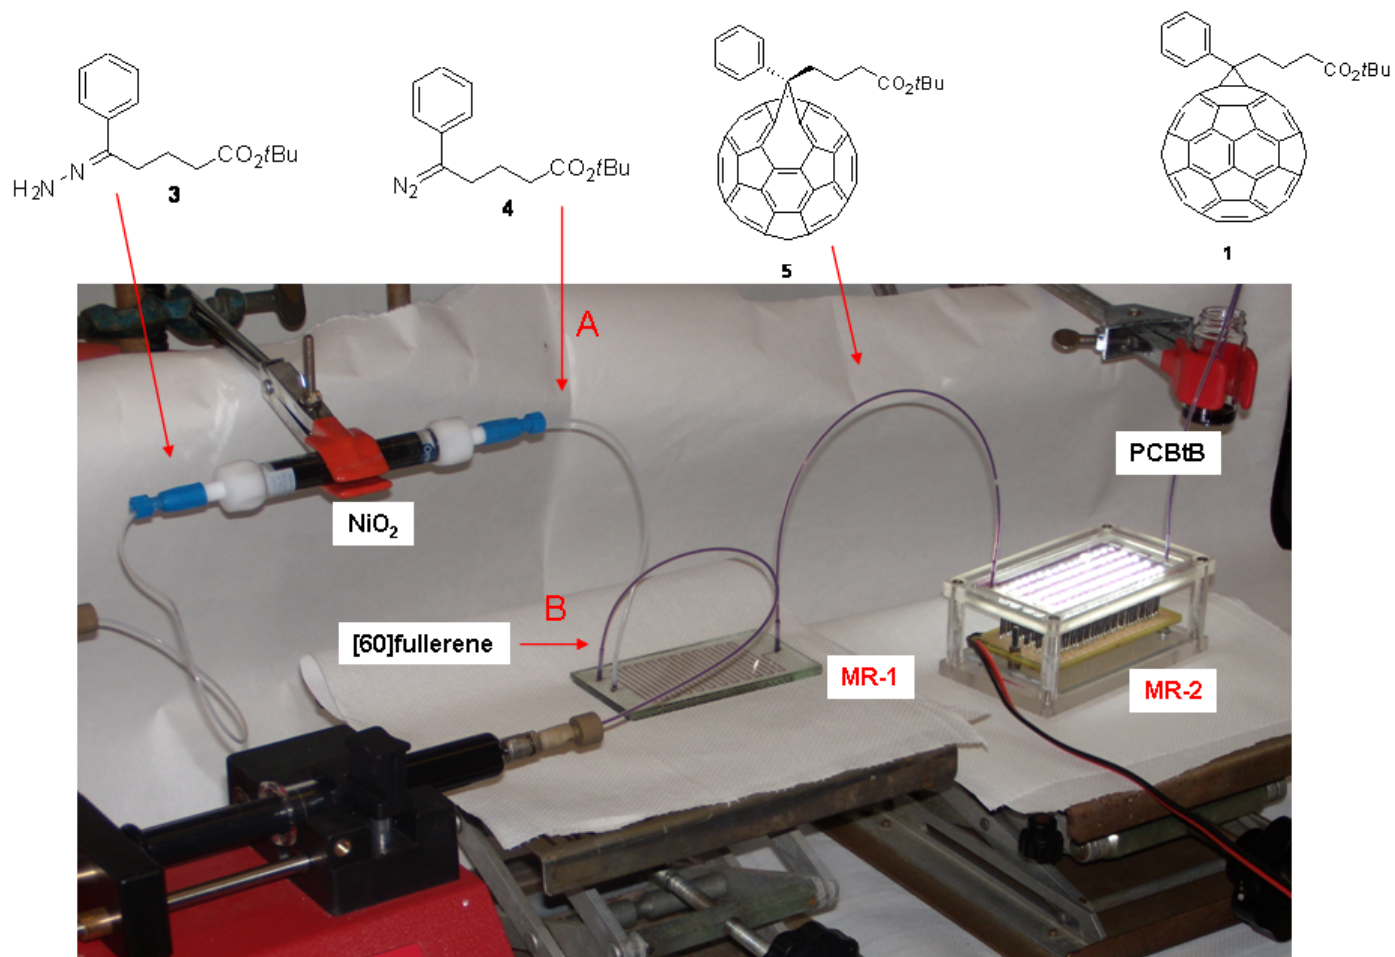

**FIGURE S1: details of MR-1**

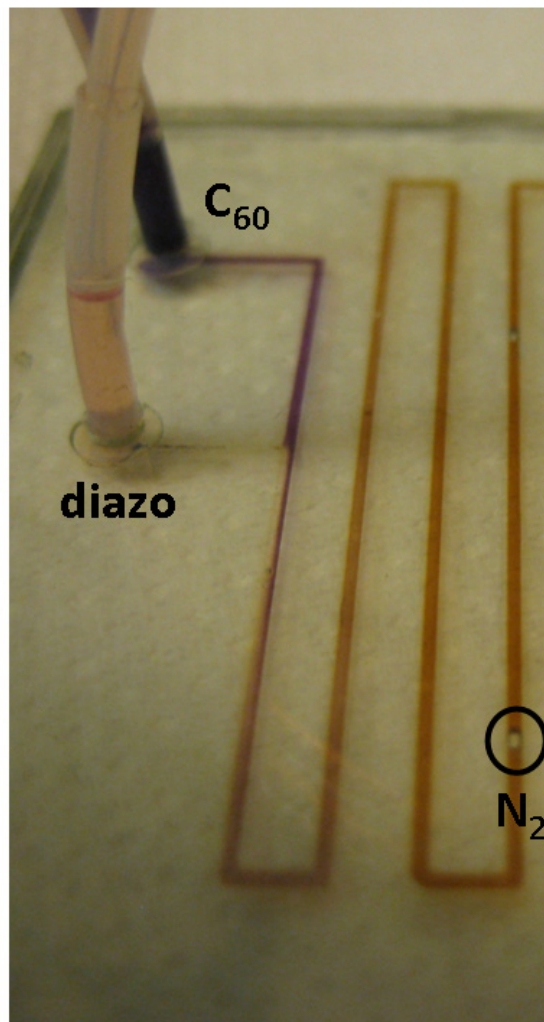

**MR-1:** total volume = 152  $\mu$ L. Main channel: length = 950 mm, width = 0.1 mm, height = 0.32 mm.

**FIGURE S1: details of photochemical MR-2**

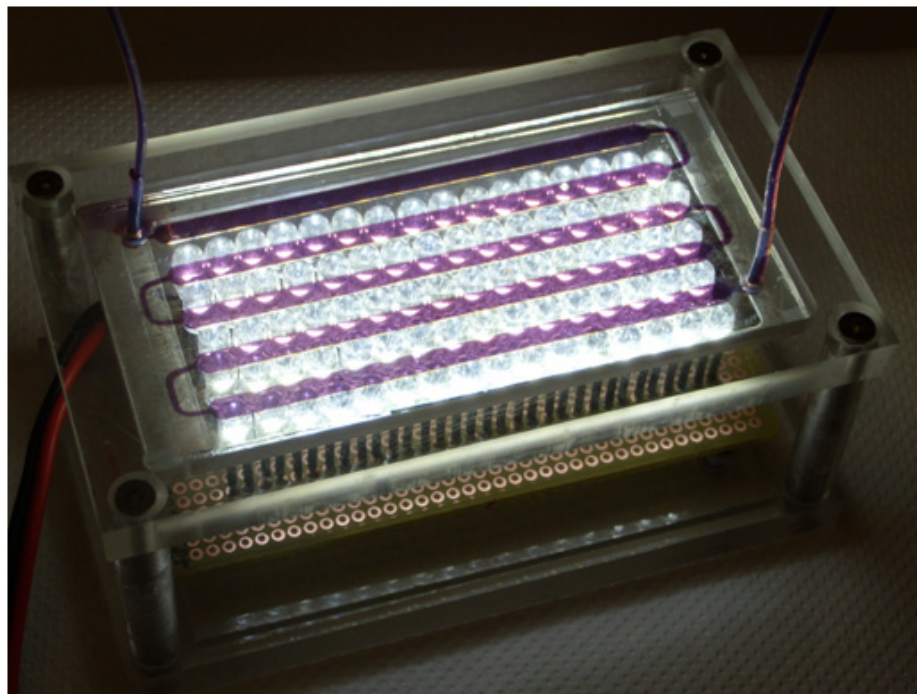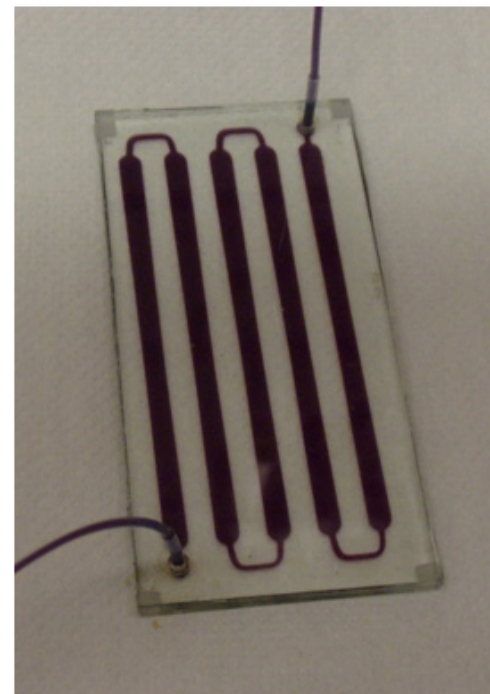

**MR-2:** total volume = 870  $\mu$ L. Each chamber has the following dimensions: length = 77.5 mm, width = 7 mm, height = 0.32 mm.

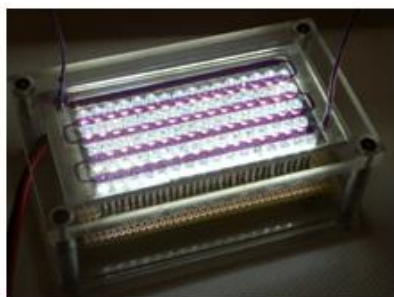

HPLC traces of reaction mixture aliquots taken at the inlet and outlet of the photochemical chip MR-2. Column: analytical Cosmosil Buckyprep. Eluent: toluene/n-hexane 7:3, flow = 1 ml/min, detector at 340 nm (see experimental section).

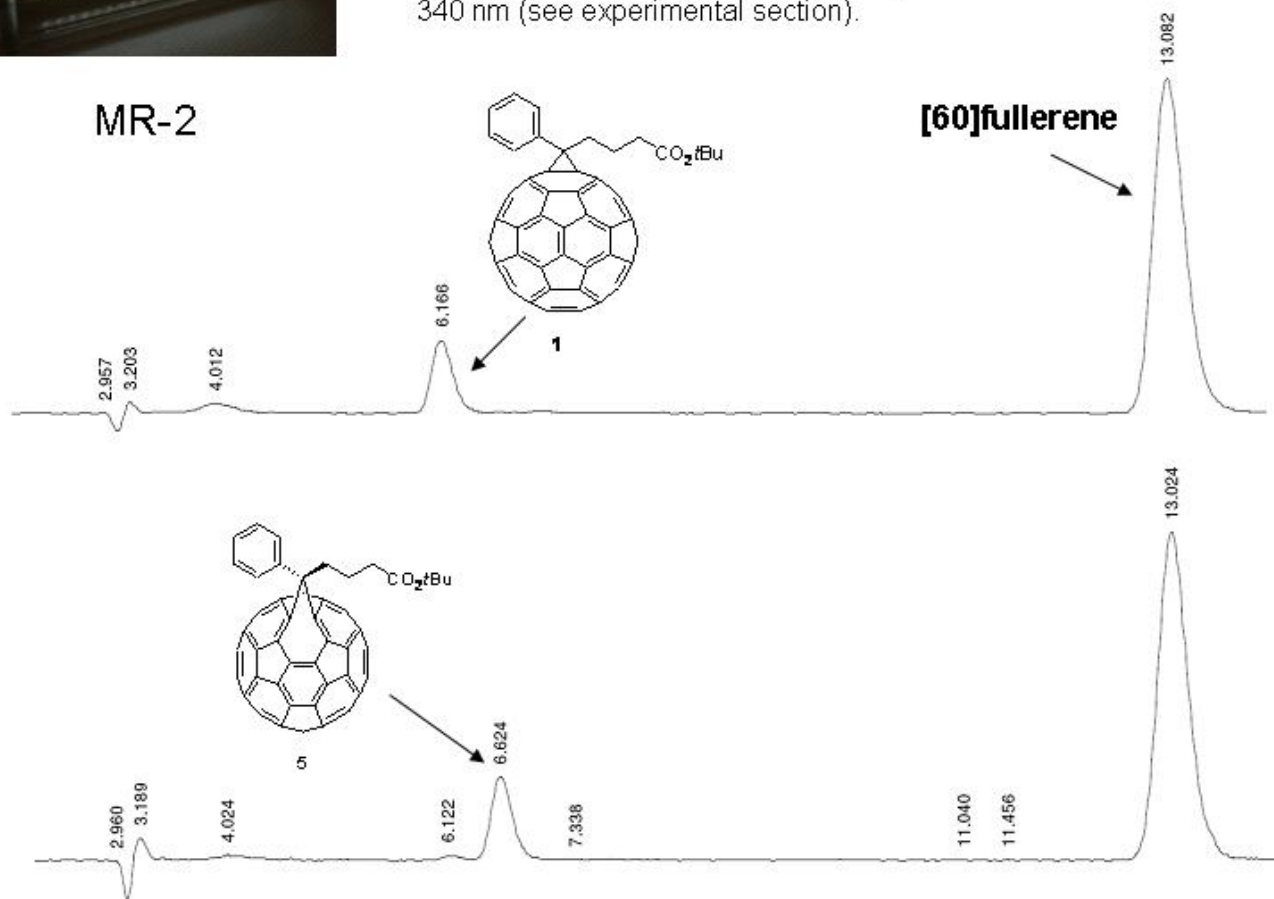



**FIGURE S2**  $^1\text{H}$  NMR spectrum of PCBtB **1**

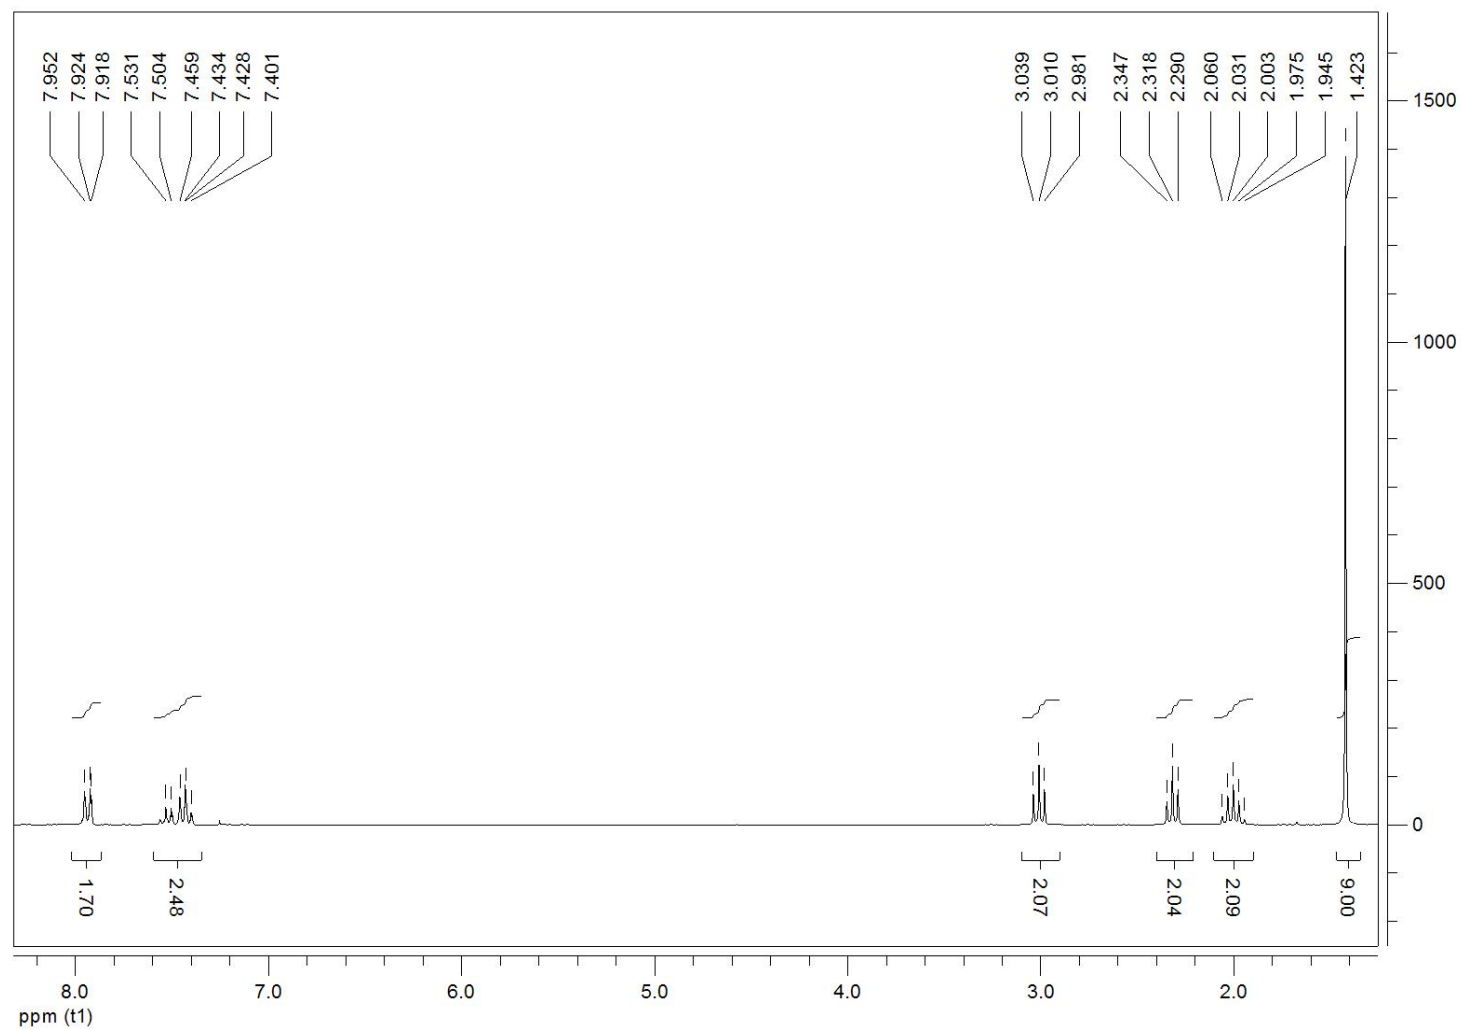

Supplementary Material for Energy & Environmental Science  
This journal is (c) The Royal Society of Chemistry 2010  
**FIGURE S3**  $^{13}\text{C}$  NMR spectrum of PCBtB 1

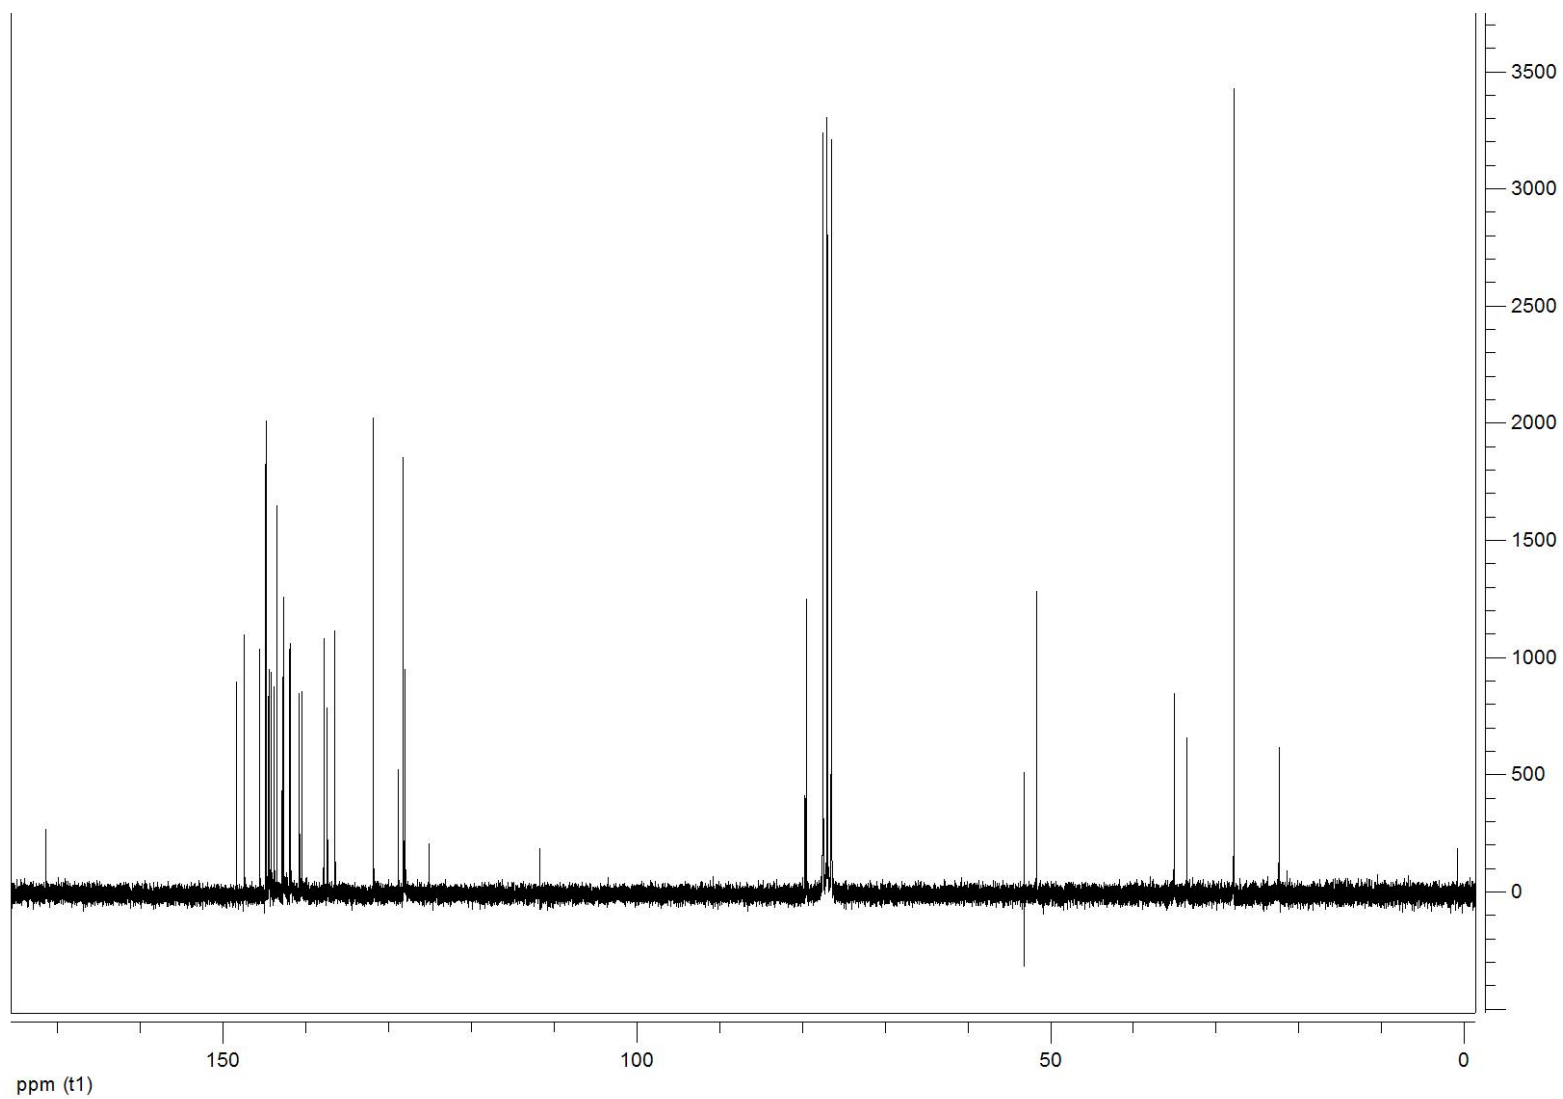

**FIGURE S4 APPI-MS spectrum of PCBtB 1**

### Display Report - Selected Window Selected Analysis

**Analysis Name:** 6\_6PCBtB.d    **Instrument:** LC-MSD-Trap-SL    **Print Date:** 07/30/2009 05:23:37 PM  
**Method:** def\_lcms.m    **Operator:** Administrator    **Acq. Date:** 4/29/2009 3:05:02 PM  
**Sample Name:** BCBTB in cicloesano 6,6  
**Analysis Info:** 100 uL/min

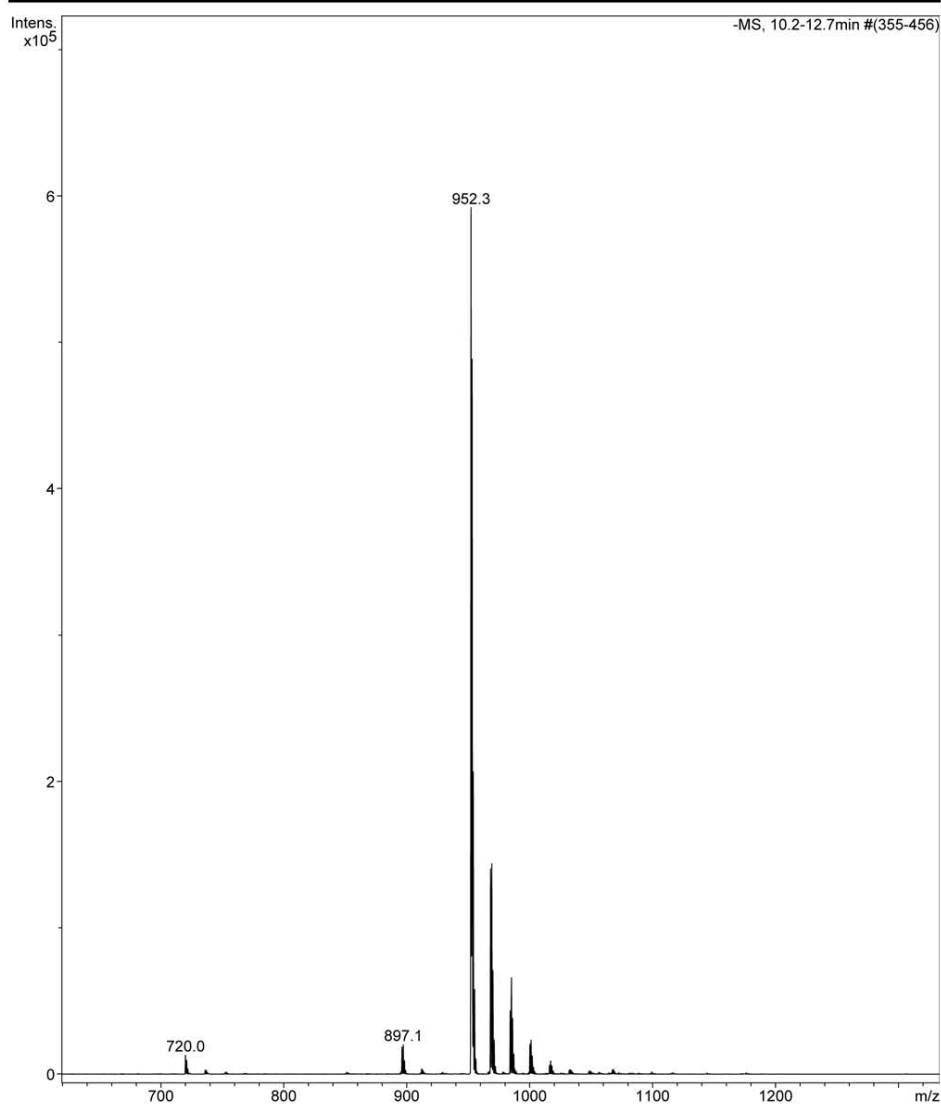

## FIGURE S5 HPLC trace for PCBtB 1

Risultati Analisi - Grafico PCBTsemipreanalisi1\_MM

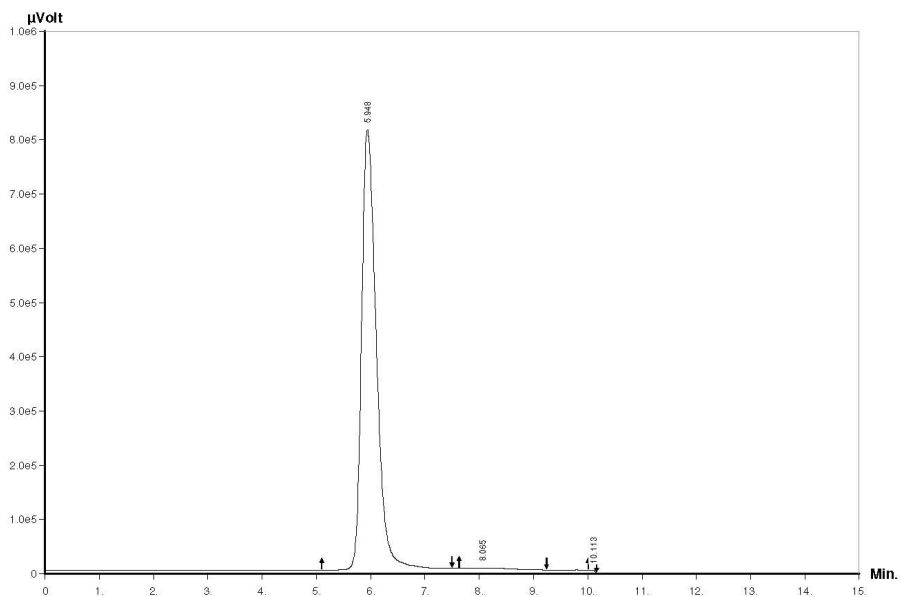

Risultati Analisi - Tabella PCBTsemipreanalisi1\_MM

| Nome Picco       | Tempo Rit. | Area       | Altezza    | Conc.    | Area Perc. |
|------------------|------------|------------|------------|----------|------------|
| Non identificato | 5.948      | 255288.773 | 810709.986 | 0.000000 | 99.447     |
| Non identificato | 8.065      | 1095.894   | 1664.870   | 0.000000 | 0.427      |
| Non identificato | 10.113     | 323.463    | 4375.814   | 0.000000 | 0.126      |

**FIGURE S6 FT-IR spectrum of *tert*-butyl-4-benzoylbutyrate diazomethane 4**

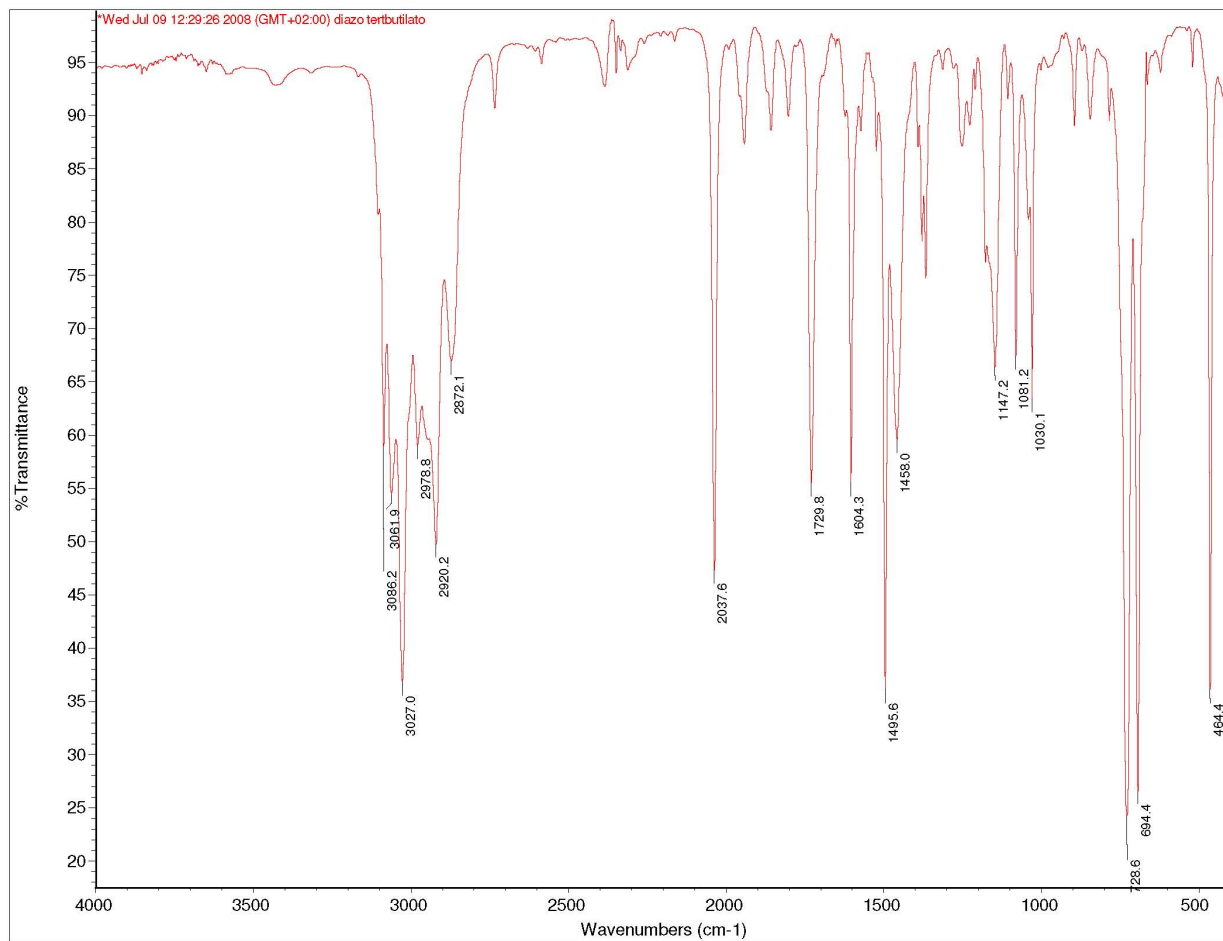

Supplement: c0ee00314j.pdf [file c0ee00314j.pdf]
